# Supplementary material for: Mitochondrial impairment in the five-sixth nephrectomy model of chronic renal failure: proteomic approach
Source: PubMed Central journal article supplement (PMC3851543; doi:10.1186/1471-2369-14-209), 2013-10-04
Supplement: 1471-2369-14-209-S1.pdf [file 1471-2369-14-209-S1.pdf]

# Sequest Summary

Sample: Berne, M. (K6) 1 mb  
 DataFiles: K6 (02/27/04-02/27/04)  
 Database: rat (01/05/2004)  
 Directory: mbernek6 View Info  
 Diff Mods: 16 M 57.02 C 0.000 X  
 OutFiles: 12831944  
 Enzyme: Trypsin\_Strict  
 Mass: ±1.5 (Mono)  
 Max list: 1000  
 Intensity: 3.569 MS2 DTA VCR

| #                                                                                                                                                                                                                                              | GBU | TIC   | File      | z | dm   | MH+    | XC   | dCn  | Sp   | RSP  | Ions | Sf    | Ref         | Sequence                        | Prob | Consensus | Depth: |
|------------------------------------------------------------------------------------------------------------------------------------------------------------------------------------------------------------------------------------------------|-----|-------|-----------|---|------|--------|------|------|------|------|------|-------|-------------|---------------------------------|------|-----------|--------|
| A gi133591997 ref NP_112319.1 246 401E:9.7e8 28% avg:2.4e7 f37.3,0.1,1.1<br>methylmalonate semialdehyde dehydrogenase gene [Rattus norvegicus] gi1400269 sp Q02253 MMSA_RAT Methylmalonate-semialdehyde dehydrogenase [acylating] (EC 1.2.1.2) |     |       |           |   |      |        |      |      |      |      |      |       |             |                                 |      |           |        |
| 429                                                                                                                                                                                                                                            |     | 7.9e7 | 1844-1888 | 2 | 0.8  | 1962.4 | 5.90 | 0.59 | 889  | 889  | 1    | 22/38 | gi133591997 | (-)VNAGDQPGADLGPLITPQAK         |      |           |        |
| 528                                                                                                                                                                                                                                            |     | 7.3e6 | 2123-2152 | 2 | 0.5  | 1888.6 | 5.59 | 0.59 | 1933 | 970  | 1    | 23/32 | gi133591997 | (-)AISFVGSNOAGEYTFER            |      |           |        |
| 422                                                                                                                                                                                                                                            |     | 6.6e7 | 1818-1840 | 2 | 0.6  | 1721.3 | 4.42 | 0.56 | 970  | 970  | 1    | 21/28 | gi133591997 | (-)WIDHNPATNEVGR                |      |           |        |
| 416                                                                                                                                                                                                                                            |     | 6.9e5 | 1791-1806 | 2 | 0.5  | 2051.7 | 4.32 | 0.44 | 883  | 883  | 1    | 18/34 | gi133591997 | (-)SDKWLIDHNPATNEVGR            |      |           |        |
| 439                                                                                                                                                                                                                                            |     | 2.0e6 | 1893-1898 | 2 | 0.8  | 1962.4 | 4.28 | 0.52 | 772  | 772  | 1    | 18/38 | gi133591997 | (-)VNAGDQPGADLGPLITPQAK         |      |           |        |
| 395                                                                                                                                                                                                                                            |     | 2.3e7 | 1754-1778 | 2 | 0.0  | 1465.8 | 4.16 | 0.48 | 1145 | 1145 | 1    | 19/26 | gi133591997 | (-)C#M*ALSTAVLVEBAK             |      |           |        |
| 428                                                                                                                                                                                                                                            |     | 2.9e6 | 1824      | 3 | -0.9 | 1722.8 | 4.07 | 0.35 | 2031 | 2031 | 1    | 30/56 | gi133591997 | (-)WIDHNPATNEVGR                |      |           |        |
| 294                                                                                                                                                                                                                                            |     | 1.5e7 | 1519-1539 | 2 | -0.3 | 1923.2 | 4.02 | 0.54 | 655  | 655  | 1    | 17/34 | gi133591997 | (-)EEDATLSSPAVVM*PTM*GR         |      |           |        |
| 352                                                                                                                                                                                                                                            |     | 1.7e7 | 1649-1680 | 2 | 0.0  | 1194.3 | 3.97 | 0.47 | 1107 | 1107 | 1    | 17/20 | gi133591997 | (-)TLADAEGDVFR                  |      |           |        |
| 482                                                                                                                                                                                                                                            |     | 1.3e6 | 2033-2038 | 2 | -0.6 | 2721.0 | 3.64 | 0.59 | 307  | 307  | 1    | 17/48 | gi133591997 | (-)GLOVEEHAC#SVNLSM*LGETM*PSITK |      |           |        |
| 414                                                                                                                                                                                                                                            |     | 3.1e7 | 1790-1816 | 2 | 0.1  | 1226.3 | 3.34 | 0.33 | 702  | 702  | 1    | 15/18 | gi133591997 | (-)OGIQEYFQAK                   |      |           |        |
| 555                                                                                                                                                                                                                                            |     | 3.3e6 | 2184-2207 | 2 | 0.3  | 1435.3 | 3.15 | 0.47 | 1025 | 1025 | 1    | 19/24 | gi133591997 | (-)AFPAWADTILSR                 |      |           |        |
| 299                                                                                                                                                                                                                                            |     | 3.7e7 | 1545-1575 | 2 | 0.4  | 1030.8 | 3.02 | 0.37 | 1253 | 1253 | 1    | 16/18 | gi133591997 | (-)EGASILLDGR                   |      |           |        |
| 288                                                                                                                                                                                                                                            |     | 8.0e7 | 1481-1516 | 2 | -0.4 | 1017.0 | 3.01 | 0.44 | 514  | 514  | 1    | 15/18 | gi133591997 | (-)VPGATM*LLAK                  |      |           |        |
| 129                                                                                                                                                                                                                                            |     | 1.7e7 | 0750-0801 | 2 | -0.4 | 1197.9 | 2.90 | 0.45 | 724  | 724  | 1    | 14/20 | gi133591997 | (-)NHGVVM*PDANK                 |      |           |        |
| 248                                                                                                                                                                                                                                            |     | 3.8e7 | 1329-1353 | 2 | -0.2 | 1078.6 | 2.90 | 0.32 | 866  | 866  | 1    | 13/14 | gi133591997 | (-)TLADAEGDVFR                  |      |           |        |
| 356                                                                                                                                                                                                                                            |     | 5.5e5 | 1689-1691 | 2 | 0.6  | 1193.7 | 2.82 | 0.53 | 575  | 575  | 1    | 13/20 | gi133591997 | (-)DM*DLYSYR                    |      |           |        |
| 154                                                                                                                                                                                                                                            |     | 5.5e6 | 0855-0883 | 2 | 0.0  | 1166.5 | 2.79 | 0.48 | 1457 | 1457 | 1    | 16/20 | gi133591997 | (-)TLADAEGDVFR                  |      |           |        |
| 351                                                                                                                                                                                                                                            |     | 3.4e7 | 1646-1687 | 1 | 0.4  | 1193.9 | 2.72 | 0.46 | 197  | 197  | 1    | 11/20 | gi133591997 | (-)AEM*EAAVAAC#K                |      |           |        |
| 541                                                                                                                                                                                                                                            |     | 5.8e5 | 2168      | 2 | 0.5  | 1888.5 | 2.66 | 0.39 | 482  | 482  | 1    | 13/32 | gi133591997 | (-)TLADAEGDVFR                  |      |           |        |
| 230                                                                                                                                                                                                                                            |     | 3.0e7 | 1235-1267 | 2 | -0.7 | 1077.2 | 2.58 | 0.11 | 583  | 583  | 6    | 13/18 | gi133591997 | (-)AISFVGSNOAGEYTFER            |      |           |        |
| 176                                                                                                                                                                                                                                            |     | 1.3e6 | 0990      | 2 | 0.0  | 902.0  | 2.27 | 0.35 | 324  | 324  | 1    | 14/14 | gi133591997 | (-)VC#NLLIDSGAK                 |      |           |        |
| 466                                                                                                                                                                                                                                            |     | 2.0e6 | 1961-1968 | 2 | -1.5 | 2693.7 | 2.20 | 0.27 | 175  | 175  | 1    | 14/46 | gi133591997 | (-)GDTNFFYK                     |      |           |        |
| 242                                                                                                                                                                                                                                            |     | 3.1e6 | 1296      | 2 | 0.1  | 902.0  | 2.18 | 0.32 | 310  | 310  | 2    | 9/14  | gi133591997 | (-)GYENGNFVGPILLISNVKPSM*TC#YK  |      |           |        |
| 456                                                                                                                                                                                                                                            |     | 1.5e6 | 1925      | 2 | 0.1  | 1042.1 | 2.09 | 0.32 | 368  | 368  | 2    | 11/14 | gi133591997 | (-)LITLLEQK                     |      |           |        |
| 232                                                                                                                                                                                                                                            |     | 1.2e7 | 1236-1270 | 1 | -0.3 | 1076.8 | 2.05 | 0.14 | 625  | 625  | 1    | 12/18 | gi133591997 | (-)WDEPVEYR                     |      |           |        |
| 240                                                                                                                                                                                                                                            |     | 3.9e7 | 1283-1326 | 1 | 0.2  | 692.7  | 1.97 | 0.07 | 537  | 537  | 14   | 8/10  | gi133591997 | (-)WDEPVEYR                     |      |           |        |
| 316                                                                                                                                                                                                                                            |     | 4.0e5 | 1601-1606 | 1 | 0.2  | 1062.9 | 1.94 | 0.24 | 307  | 307  | 7    | 9/14  | gi133591997 | (-)VC#NLLIDSGAK                 |      |           |        |
| 471                                                                                                                                                                                                                                            |     | 3.9e5 | 1982-1995 | 2 | -0.5 | 2281.0 | 1.94 | 0.20 | 399  | 399  | 1    | 14/42 | gi133591997 | (-)LITLLEQK                     |      |           |        |
| 418                                                                                                                                                                                                                                            |     | 1.0e7 | 1792-1817 | 1 | 0.5  | 1225.9 | 1.94 | 0.17 | 84   | 84   | 3    | 11/18 | gi133591997 | (-)DMDLFSYR                     |      |           |        |
| 238                                                                                                                                                                                                                                            |     | 1.1e8 | 1276-1332 | 1 | 0.2  | 901.9  | 1.84 | 0.03 | 487  | 487  | 1    | 10/14 | gi133591997 | (-)IVNDNPPYGNQVAIFTTNGATAR      |      |           |        |
| 306                                                                                                                                                                                                                                            |     | 3.3e5 | 1589      | 2 | 0.2  | 1031.0 | 1.83 | 0.34 | 425  | 425  | 2    | 10/18 | gi133591997 | (-)OGIQEYFQAK                   |      |           |        |
| 173                                                                                                                                                                                                                                            |     | 5.3e7 | 0962-1010 | 1 | 0.2  | 901.8  | 1.76 | 0.22 | 151  | 151  | 2    | 7/14  | gi133591997 | (-)LITLLEQK                     |      |           |        |
|                                                                                                                                                                                                                                                |     |       |           |   |      |        |      |      |      |      |      |       |             |                                 |      |           |        |



# Flicka

- [Setup](#)
- [Create DTA](#)
- [View DTA](#)
- [Run Sequest](#)
- [Status](#)
- [Summary](#)
- [Home](#)

Sample: Berne, M. K6 1

Send to: [PEPQUT](#) [PEPSTAT](#) [BLAST](#) **[NCBI: SEQUENCE](#)** [RESTRUCT](#)

>gi|13591997|ref|NP\_112319.1| methylmalonate semialdehyde dehydrogenase gene [Rattus norvegicus]  
 gi|400269|sp|Q02253|MMSA\_RAT Methylmalonate-semialdehyde dehydrogenase [acylating], mitochondrial precursor (MMSDH) gi|347034|pir|A44097 methylmalonate-semialdehyde dehydrogenase (acylating) (EC 1.2.1.27) - rat  
 gi|205526|gb|AA441638.1| methylmalonate semialdehyde dehydrogenase [MASS=57808] [MASS=57808]  
 MAAAVVAAAA VRSRILQVSS KVNSTWYPAS SFSSSVPTV KLFDGKFEV SKSDKWTIDH NPATNEVYGR VPOSTKAEME  
**AAVAACKRAF PAWADTSILS ROOVLIRYQQ LIKENLIKETA RLITTEQKKT IADAEQDVER GLOVEHACS VTSIMLGETM**  
**PSITKMDILY SYRLPLGVCA GIAPENFPAM IPLMFPVAM VCGNTFLMKP SERVPGATML IAKLIQDSGA PDGTLNIIHG**  
 OHEAVNFI CD HPDIKAISFV GSNQAGEYIF ERGRNNGKRV QANMGAKNHG VMPPDANKEN TLNQLVGAAL GAAGQRSMAL  
**STAVLVGEAK KWLPELVERA KNLRVYAGDQ PGADIGPLIT PQAKEYCNL IDSGAKEGAS ILLDGRKIKV KGYENGNFTVG**  
**PTIISNVKES MTCYKEEIFG PVLVLELET IDEAIKIVND NRYGNGLAIF TINGAIAKRY AHMVDVGQYG VNVPIVPLP**  
 MEFSTGSRSS FRGDTNFFYGK QGIGFTYQLK TITTSQKKEED ATLISSPAYVM PTMGR

Mass (mono): 57770.6 Identifier: gi|13591997 Database: C:/database/rat.fasta  
 Protein Coverage: 301/535 = 56.3% by amino acid count, 32467.4/57770.6 = 56.2% by mass

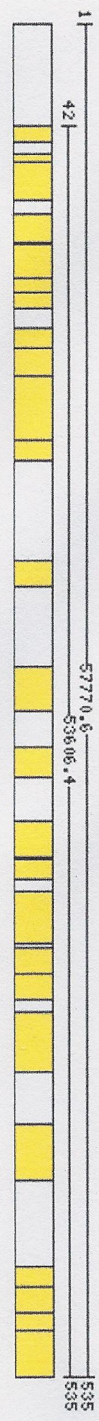

Sort by:  Sequence  Position

| Sequence                    | Position  |
|-----------------------------|-----------|
| PERSTAT AEEMEAAVAACK        | 77 - 87   |
| PERSTAT AAFPAMADTSILSR      | 89 - 101  |
| PERSTAT AISFVGSNOAGEYIFER   | 256 - 272 |
| PERSTAT CMALSTAVLVGEAK      | 317 - 330 |
| PERSTAT DMDLYSYR            | 166 - 173 |
| PERSTAT EEDATLISSPAYVMPTMGR | 518 - 535 |
| PERSTAT EGASILLDGR          | 377 - 386 |
| PERSTAT GDTNFFYGK           | 493 - 500 |
| PERSTAT                     | 141 - 165 |



# Sequest Summary

Sample: Berne, M. (K7) 1 mb

Datafiles: KZ (03/01/04-03/01/04)

Database: rat (01/05/2004)

Directory: mbernek7 View Info

Diff Mods: 16 M 57.02 C 0.000 X

Outfiles: 13801925

Enzyme: Trypsin\_Strict

Mass: ±1.5 (Mono)

Max list: 1000

Intensity: 8.4e9

MS2

DTA VCR

File Select Sequest Protein Utilities Help

| # | GBU | TIC | File | z | DM | MH+ | XC | dcn | Sp | RSP | Ions | Sf | Ref | Sequence | Prob | Consensus | Depth: |
|---|-----|-----|------|---|----|-----|----|-----|----|-----|------|----|-----|----------|------|-----------|--------|
|---|-----|-----|------|---|----|-----|----|-----|----|-----|------|----|-----|----------|------|-----------|--------|

228 421X:2.8e9|33%|avg:6.6e7|37.320013

argininosuccinate synthetase 1 [Rattus norvegicus] |gi114291|sp|P09034|ASSY\_RAT\_Argininosuccinate synthase (Citruiline--aspartate ligase)

arg168637|p|ir||AARTRs\_argininosuccinate synthase (EC 6.3.4.5) - rat |gi155767|emb|CAA30999.1| unnamed protei

|      |       |           |   |      |        |      |      |      |    |       |   |       |             |                               |  |  |  |
|------|-------|-----------|---|------|--------|------|------|------|----|-------|---|-------|-------------|-------------------------------|--|--|--|
| 921  | 1.2e7 | 2715-2751 | 2 | -0.6 | 2315.7 | 5.65 | 0.61 | 1249 | 1  | 22/40 | 1 | 22/40 | gi 25453414 | (-) DGTTHSTSLDLEFM*YLNEVAGK   |  |  |  |
| 924  | 5.3e7 | 2716-2741 | 3 | -0.7 | 2315.8 | 5.59 | 0.54 | 1806 | 1  | 32/80 | 1 | 32/80 | gi 25453414 | (-) DGTTHSTSLDLEFM*YLNEVAGK   |  |  |  |
| 761  | 2.2e8 | 2329-2370 | 3 | -0.4 | 2693.6 | 5.43 | 0.52 | 2136 | 1  | 39/88 | 1 | 39/88 | gi 25453414 | (-) SPWSM*DENIM*HISYBAGILENPK |  |  |  |
| 658  | 1.1e8 | 2049-2079 | 3 | 0.5  | 1601.3 | 5.43 | 0.50 | 1110 | 1  | 28/52 | 1 | 28/52 | gi 25453414 | (-) APNTPDYLEIEFFK            |  |  |  |
| 883  | 1.4e8 | 2613-2655 | 2 | 0.8  | 1782.2 | 5.38 | 0.57 | 1432 | 1  | 21/30 | 1 | 21/30 | gi 25453414 | (-) EOGYDVIAYLANIGOK          |  |  |  |
| 851  | 7.3e6 | 2501-2514 | 3 | -0.7 | 2677.9 | 4.91 | 0.14 | 1133 | 1  | 29/88 | 1 | 29/88 | gi 25453414 | (-) SPWSM*DENIM*HISYBAGILENPK |  |  |  |
| 868  | 2.3e7 | 2577-2614 | 2 | -0.7 | 2374.8 | 4.72 | 0.51 | 1079 | 1  | 18/36 | 1 | 18/36 | gi 25453414 | (-) SPWSM*DENIM*HISYBAGILENPK |  |  |  |
| 762  | 1.3e7 | 2338-2352 | 2 | -1.1 | 2694.3 | 4.59 | 0.47 | 645  | 1  | 18/44 | 1 | 18/44 | gi 25453414 | (-) EOGYDVIAYLANIGOK          |  |  |  |
| 887  | 2.8e6 | 2622-2650 | 3 | 0.5  | 1782.5 | 4.56 | 0.34 | 1442 | 1  | 29/60 | 1 | 29/60 | gi 25453414 | (-) SPWSM*DENIM*HISYBAGILENPK |  |  |  |
| 938  | 3.3e5 | 2779-2791 | 2 | 0.8  | 2299.8 | 4.24 | 0.54 | 1152 | 1  | 19/40 | 1 | 19/40 | gi 25453414 | (-) EOGYDVIAYLANIGOK          |  |  |  |
| 655  | 6.1e7 | 2044-2082 | 2 | 1.4  | 1600.5 | 4.15 | 0.47 | 630  | 1  | 17/26 | 1 | 17/26 | gi 25453414 | (-) APNTPDYLEIEFFK            |  |  |  |
| 733  | 5.9e6 | 2259-2260 | 2 | 0.7  | 1472.9 | 3.88 | 0.53 | 848  | 1  | 17/24 | 1 | 17/24 | gi 25453414 | (-) APNTPDYLEIEFFK            |  |  |  |
| 719  | 5.9e8 | 2207-2254 | 2 | 0.3  | 1473.3 | 3.76 | 0.40 | 649  | 1  | 17/24 | 1 | 17/24 | gi 25453414 | (-) APNTPDYLEIEFFK            |  |  |  |
| 1007 | 6.5e6 | 3030-3034 | 3 | -1.5 | 2851.9 | 3.28 | 0.23 | 381  | 1  | 26/96 | 1 | 26/96 | gi 25453414 | (-) GIYEPBAGTIIYHAHDIEAFTM*DR |  |  |  |
| 534  | 1.1e8 | 1811-1835 | 2 | -1.2 | 995.4  | 3.23 | 0.20 | 867  | 1  | 15/16 | 1 | 15/16 | gi 25453414 | (-) YLGTSLAR                  |  |  |  |
| 439  | 7.0e7 | 1420-1456 | 2 | 0.4  | 1064.8 | 3.04 | 0.39 | 725  | 1  | 14/16 | 1 | 14/16 | gi 25453414 | (-) KVFIEDVSK                 |  |  |  |
| 454  | 3.5e7 | 1517-1537 | 2 | 0.1  | 937.0  | 2.82 | 0.26 | 443  | 1  | 12/14 | 1 | 12/14 | gi 25453414 | (-) VFIEDVSK                  |  |  |  |
| 475  | 8.7e7 | 1588-1621 | 2 | 0.0  | 906.1  | 2.66 | 0.37 | 718  | 1  | 14/18 | 1 | 14/18 | gi 25453414 | (-) GQVYTIIGR                 |  |  |  |
| 366  | 5.9e6 | 1162      | 2 | -0.4 | 1213.0 | 2.55 | 0.43 | 564  | 1  | 14/18 | 1 | 14/18 | gi 25453414 | (-) GRNDLM*EYAK               |  |  |  |
| 274  | 2.6e7 | 0845-0868 | 2 | -1.1 | 973.3  | 2.44 | 0.10 | 531  | 1  | 11/14 | 1 | 11/14 | gi 25453414 | (-) KOVELAOR                  |  |  |  |
| 374  | 8.7e7 | 1183-1219 | 2 | -0.8 | 1000.2 | 2.37 | 0.23 | 901  | 1  | 13/14 | 1 | 13/14 | gi 25453414 | (-) NDLM*EYAK                 |  |  |  |
| 441  | 1.6e6 | 1429-1447 | 1 | 0.9  | 1064.4 | 2.29 | 0.29 | 596  | 1  | 11/16 | 1 | 11/16 | gi 25453414 | (-) KVFIEDVSK                 |  |  |  |
| 389  | 7.3e7 | 1225-1255 | 2 | -0.5 | 972.9  | 2.16 | 0.32 | 698  | 1  | 12/12 | 1 | 12/12 | gi 25453414 | (-) M*PEFYNR                  |  |  |  |
| 456  | 7.3e7 | 1525-1543 | 2 | 0.1  | 806.9  | 2.15 | 0.08 | 410  | 1  | 11/12 | 1 | 11/12 | gi 25453414 | (-) VOVSVER                   |  |  |  |
| 452  | 5.7e7 | 1506-1540 | 1 | 0.6  | 936.5  | 2.11 | 0.21 | 645  | 2  | 10/14 | 1 | 10/14 | gi 25453414 | (-) VFIEDVSK                  |  |  |  |
| 453  | 1.5e8 | 1512-1555 | 1 | 0.1  | 806.8  | 2.08 | 0.15 | 792  | 1  | 10/12 | 1 | 10/12 | gi 25453414 | (-) VOVSVER                   |  |  |  |
| 395  | 1.5e7 | 1267-1273 | 2 | -0.8 | 973.2  | 2.03 | 0.15 | 474  | 1  | 10/12 | 1 | 10/12 | gi 25453414 | (-) M*PEFYNR                  |  |  |  |
| 306  | 2.8e7 | 1003-1031 | 2 | 0.6  | 895.3  | 2.00 | 0.17 | 580  | 1  | 11/12 | 1 | 11/12 | gi 25453414 | (-) EDPEEAR                   |  |  |  |
| 492  | 1.1e6 | 1656-1669 | 1 | 0.9  | 1186.5 | 1.95 | 0.39 | 93   | 1  | 10/20 | 1 | 10/20 | gi 25453414 | (-) OHGIPIPVTPK               |  |  |  |
| 212  | 1.5e7 | 0520-0543 | 2 | 0.4  | 845.6  | 1.92 | 0.02 | 359  | 3  | 9/10  | 1 | 9/10  | gi 25453414 | (-) LKEYHR                    |  |  |  |
| 491  | 1.7e8 | 1650-1681 | 3 | -0.1 | 1187.5 | 1.87 | 0.02 | 471  | 1  | 18/40 | 1 | 18/40 | gi 25453414 | (-) OHGIPIPVTPK               |  |  |  |
| 473  | 1.7e8 | 1581-1627 | 1 | 0.2  | 905.9  | 1.78 | 0.08 | 208  | 44 | 9/14  | 1 | 9/14  | gi 25453414 | (-) GQVYTIIGR                 |  |  |  |
| 488  | 8.9e7 | 1649-1684 | 2 | 0.2  | 1187.2 | 1.77 | 0.07 | 293  | 1  | 14/20 | 1 | 14/20 | gi 25453414 | (-) OHGIPIPVTPK               |  |  |  |



|     |       |           |   |      |        |      |      |     |    |       |    |             |                |
|-----|-------|-----------|---|------|--------|------|------|-----|----|-------|----|-------------|----------------|
| 296 | 3.8e7 | 0941-0970 | 2 | 0.4  | 843.6  | 1.61 | ---- | 445 | 1  | 12/12 | -- | gi 25453414 | (-) QVEIAOR    |
| 359 | 2.2e7 | 1139-1210 | 1 | -0.1 | 999.6  | 1.58 | 0.12 | 104 | 3  | 9/14  | -- | gi 25453414 | (-) NDLM*ETAK  |
| 298 | 2.3e7 | 0946-0972 | 1 | 0.1  | 843.9  | 1.57 | 0.02 | 83  | 1  | 9/12  | -- | gi 25453414 | (-) QVEIAOR    |
| 458 | 2.5e7 | 1541-1573 | 1 | 0.5  | 741.4  | 1.32 | ---- | 138 | 72 | 6/10  | -- | gi 25453414 | (-) VIAPWR     |
| 532 | 6.5e7 | 1807-1843 | 1 | 0.2  | 994.0  | 1.26 | 0.11 | 68  | 13 | 9/16  | -- | gi 25453414 | (-) YLLGTSIAR  |
| 397 | 3.5e6 | 1272-1290 | 1 | 0.8  | 1088.4 | 1.03 | ---- | 234 | 1  | 11/18 | -- | gi 25453414 | (-) NOAPPGLYTK |
| 393 | 1.5e7 | 1241-1253 | 1 | 0.0  | 972.4  | 1.09 | 0.15 | 46  | 4  | 7/12  | -- | gi 25453414 | (-) M*PEFYNR   |
| 311 | 5.9e7 | 1020-1059 | 1 | 0.0  | 615.8  | 0.93 | ---- | 62  | 1  | 8/10  | -- | gi 25453414 | (-) OGLGLK     |
| 206 | 2.5e5 | 0502      | 1 | 0.6  | 627.2  | 0.77 | ---- | 102 | 19 | 4/10  | -- | gi 25453414 | (-) KGVPEVK    |

|                                                                                                                                                                                                                                                                                                                                                                             |       |           |   |      |        |      |      |      |    |       |    |            |                         |
|-----------------------------------------------------------------------------------------------------------------------------------------------------------------------------------------------------------------------------------------------------------------------------------------------------------------------------------------------------------------------------|-------|-----------|---|------|--------|------|------|------|----|-------|----|------------|-------------------------|
| <p><b>B</b> gi 18392833 ref NP_058682.1  132 18 E:2.6e8 3% avg:1.5e7 15.0,2.0,0.2 </p> <p>acetyl-coenzyme A dehydrogenase, medium chain; Acyl-Coenzyme A dehydrogenase, C-4 to C-12 straight-chain [Rattus norvegicus] gi 113018 sp P08503 ACDM_RAT Acyl-Coa dehydrogenase, medium-chain specific, mitochondrial precursor (MCAD) gi 66079 pir DERTCM acyl-CoA dehydrog</p> |       |           |   |      |        |      |      |      |    |       |    |            |                         |
| 767                                                                                                                                                                                                                                                                                                                                                                         | 3.4e7 | 2351-2380 | 2 | 0.6  | 1873.6 | 5.31 | 0.62 | 1981 | 1  | 24/34 | -- | gi 8392833 | (-) AFTGFTVEADTPGIHIGK  |
| 459                                                                                                                                                                                                                                                                                                                                                                         | 6.4e7 | 1547-1577 | 2 | 0.2  | 1468.5 | 4.55 | 0.48 | 1202 | 1  | 22/28 | -- | gi 8392833 | (-) TRPTVAAGVGLAOR      |
| 736                                                                                                                                                                                                                                                                                                                                                                         | 5.4e7 | 2265-2307 | 2 | 0.5  | 1838.5 | 4.33 | 0.52 | 671  | 1  | 23/30 | -- | gi 8392833 | (-) QEPGLGESFELLTEQOK   |
| 738                                                                                                                                                                                                                                                                                                                                                                         | 8.8e5 | 2266-2280 | 2 | -0.9 | 2049.0 | 4.13 | 0.55 | 716  | 1  | 19/34 | -- | gi 8392833 | (-) LVEHOGVSELLAEM*AM*K |
| 466                                                                                                                                                                                                                                                                                                                                                                         | 2.3e7 | 1553-1570 | 3 | 0.7  | 1468.0 | 3.94 | 0.23 | 1015 | 1  | 26/56 | -- | gi 8392833 | (-) TRPTVAAGVGLAOR      |
| 346                                                                                                                                                                                                                                                                                                                                                                         | 7.5e6 | 1115-1146 | 2 | 0.2  | 1251.2 | 3.94 | 0.32 | 1509 | 1  | 16/20 | -- | gi 8392833 | (-) KGEVYINGOK          |
| 530                                                                                                                                                                                                                                                                                                                                                                         | 2.9e6 | 1806      | 2 | 0.7  | 1583.1 | 3.69 | 0.39 | 1512 | 1  | 19/24 | -- | gi 8392833 | (-) IYQIYEGTAQIQR       |
| 741                                                                                                                                                                                                                                                                                                                                                                         | 1.9e6 | 2267      | 3 | -1.1 | 2049.2 | 3.01 | 0.25 | 568  | 1  | 21/68 | -- | gi 8392833 | (-) LVEHOGVSELLAEM*AM*K |
| 765                                                                                                                                                                                                                                                                                                                                                                         | 1.0e6 | 2347      | 2 | 0.4  | 1170.0 | 2.75 | 0.51 | 1120 | 1  | 14/16 | -- | gi 8392833 | (-) ANWYFVTR            |
| 688                                                                                                                                                                                                                                                                                                                                                                         | 2.8e7 | 2130-2154 | 2 | -0.1 | 1151.5 | 2.44 | 0.25 | 484  | 1  | 13/18 | -- | gi 8392833 | (-) SGEYPPFLIK          |
| 407                                                                                                                                                                                                                                                                                                                                                                         | 4.5e6 | 1330-1356 | 2 | -0.3 | 991.3  | 2.43 | 0.33 | 963  | 2  | 14/16 | -- | gi 8392833 | (-) AAMEVDSGR           |
| 536                                                                                                                                                                                                                                                                                                                                                                         | 3.6e6 | 1839      | 2 | 0.4  | 1234.0 | 2.42 | 0.33 | 461  | 1  | 15/22 | -- | gi 8392833 | (-) ENVLIGEGAFK         |
| 770                                                                                                                                                                                                                                                                                                                                                                         | 9.4e5 | 2353-2376 | 3 | 0.4  | 1873.8 | 2.09 | 0.10 | 246  | 1  | 17/68 | -- | gi 8392833 | (-) AFTGFTVEADTPGIHIGK  |
| 813                                                                                                                                                                                                                                                                                                                                                                         | 6.0e5 | 2448      | 2 | -2.0 | 1876.1 | 1.86 | 0.14 | 280  | 1  | 11/34 | -- | gi 8392833 | (-) AFTGFTVEADTPGIHIGK  |
| 214                                                                                                                                                                                                                                                                                                                                                                         | 1.6e7 | 0525-0555 | 1 | 0.1  | 747.7  | 1.70 | 0.06 | 377  | 2  | 8/12  | -- | gi 8392833 | (-) ALDEATK             |
| 494                                                                                                                                                                                                                                                                                                                                                                         | 1.3e7 | 1668-1687 | 1 | 0.5  | 1014.7 | 1.67 | 0.20 | 369  | 1  | 11/16 | -- | gi 8392833 | (-) NTFYFASIAK          |
| 391                                                                                                                                                                                                                                                                                                                                                                         | 5.9e6 | 1231-1237 | 1 | 0.6  | 864.4  | 1.37 | ---- | 144  | 21 | 8/12  | -- | gi 8392833 | (-) EFQTIAR             |
| 1258                                                                                                                                                                                                                                                                                                                                                                        | 1.8e5 | 3792      | 2 | -1.3 | 1929.5 | 1.14 | ---- | 137  | 9  | 10/32 | -- | gi 8392833 | (-) ALDEATRYALDRKTFK    |

|                                                                                                                                                                                                                                                                                                         |       |           |   |      |        |      |      |      |   |       |    |            |                             |
|---------------------------------------------------------------------------------------------------------------------------------------------------------------------------------------------------------------------------------------------------------------------------------------------------------|-------|-----------|---|------|--------|------|------|------|---|-------|----|------------|-----------------------------|
| <p><b>C</b> gi 1730519 sp P50310 PGK_CRIGR 134 18 E:1.1e8 1% avg:6.3e6 14.4,0.0,0.0 </p> <p>phosphoglycerate kinase gi 2117894 pir 148074 phosphoglycerate kinase (EC 2.7.2.3) - Chinese hamster gi 987048 emb CAA86028.1  phosphoglycerate kinase [Crickettulus griseus] [MASS=44563] [MASS=44563]</p> |       |           |   |      |        |      |      |      |   |       |    |            |                             |
| 570                                                                                                                                                                                                                                                                                                     | 1.0e7 | 1913-1935 | 2 | 0.8  | 1741.2 | 4.84 | 0.62 | 1620 | 1 | 25/34 | -- | gi 1730519 | (-) VSHVSTGGASLELLEEK       |
| 782                                                                                                                                                                                                                                                                                                     | 3.3e6 | 2401-2424 | 2 | 0.9  | 2023.3 | 4.75 | 0.36 | 1102 | 1 | 21/34 | -- | gi 1730519 | (-) ITLPPVDFVTADKEDENAK     |
| 553                                                                                                                                                                                                                                                                                                     | 2.3e7 | 1879-1894 | 3 | 0.2  | 1635.6 | 4.49 | 0.46 | 1231 | 1 | 29/56 | -- | gi 1730519 | (-) LGDVIYVNDAFGTAHR        |
| 847                                                                                                                                                                                                                                                                                                     | 8.3e6 | 2494-2512 | 2 | 0.2  | 1769.9 | 4.42 | ---- | 1277 | 1 | 21/32 | -- | gi 1730519 | (-) ALESPPERPELAILGGAK      |
| 842                                                                                                                                                                                                                                                                                                     | 1.0e7 | 2487-2511 | 3 | 0.7  | 1769.4 | 4.34 | 0.24 | 1689 | 1 | 37/64 | -- | gi 1730519 | (-) ALESPPERPELAILGGAK      |
| 550                                                                                                                                                                                                                                                                                                     | 1.7e7 | 1878-1895 | 2 | 0.6  | 1635.2 | 4.04 | 0.36 | 1497 | 1 | 20/28 | -- | gi 1730519 | (-) LGDVIYVNDAFGTAHR        |
| 575                                                                                                                                                                                                                                                                                                     | 3.7e6 | 1925-1932 | 3 | 0.1  | 1741.9 | 3.66 | 0.48 | 1466 | 1 | 30/68 | -- | gi 1730519 | (-) VSHVSTGGASLELLEEK       |
| 538                                                                                                                                                                                                                                                                                                     | 9.9e5 | 1840-1861 | 2 | -1.0 | 2000.0 | 3.45 | 0.33 | 526  | 1 | 16/34 | -- | gi 1730519 | (-) VLNMM*EIGTSLIYDEEGAK    |
| 425                                                                                                                                                                                                                                                                                                     | 6.9e6 | 1375-1385 | 2 | 0.1  | 1383.6 | 3.30 | ---- | 1142 | 1 | 17/24 | -- | gi 1730519 | (-) AHSMM*VGVNLPQK          |
| 218                                                                                                                                                                                                                                                                                                     | 1.6e6 | 0548      | 2 | 0.1  | 1102.1 | 2.96 | 0.12 | 881  | 1 | 14/16 | -- | gi 1730519 | (-) NNQITNNOR               |
| 606                                                                                                                                                                                                                                                                                                     | 8.5e6 | 1972-1985 | 2 | -0.8 | 1221.2 | 2.79 | 0.36 | 492  | 1 | 15/20 | -- | gi 1730519 | (-) YSLEPVADELK             |
| 509                                                                                                                                                                                                                                                                                                     | 6.6e5 | 1740-1747 | 2 | -0.5 | 2067.5 | 2.28 | 0.06 | 193  | 1 | 14/36 | -- | gi 1730519 | (-) SVVLM*SHLGRPDGVPVPM*PDK |
| 554                                                                                                                                                                                                                                                                                                     | 1.0e7 | 1885-1908 | 1 | 0.5  | 734.4  | 1.78 | ---- | 494  | 3 | 8/10  | -- | gi 1730519 | (-) DVLFLK                  |
| 785                                                                                                                                                                                                                                                                                                     | 7.9e6 | 2411-2417 | 3 | -0.9 | 2025.1 | 1.72 | 0.11 | 360  | 1 | 20/68 | -- | gi 1730519 | (-) ITLPPVDFVTADKEDENAK     |



# Flicka

- [Setup](#)
- [Create DTA](#)
- [View DTA](#)
- [Run Request](#)
- [Status](#)
- [Summary](#)
- [Home](#)

Sample: Berne, M. K7 1

Send to: [PEPQUT](#) [PEPSTRT](#) [BLAST](#) [NCBI: SEQUENCE](#) [HE STRUCT](#)

```
>gi|25453414|ref|NP_037289.1| argininosuccinate synthetase; argininosuccinate synthetase 1 [Rattus norvegicus]
gi|114291|sp|P09034|ASSY_RAT Argininosuccinate synthase (Citruulline--aspartate ligase) gi|68637|pir||AJRTRS
argininosuccinate synthase (EC 6.3.4.5) - rat gi|55767|emb|CAA30999.1| unnamed protein product [Rattus
norvegicus] gi|203016|gb|AAA40771.1| argininosuccinate synthetase [Rattus norvegicus] [MASS=46496] [MASS=46496]
MSSKGSVWLA YSGGLDITSCI IVMLEQGYD VIAYLANIGQ KEDEFEARKK ALKIGAKKVF LEDVSKELFVE EPIWPAVQSS
ALYEDRYLLG TSLARPCIAR KOVEIAQREG AKYVSHGATG KANDQVRBEL TCYSLAPQIK VIAPWMPDEF YNRFKGRNDL
MEYAKQHGIP IPVTPKSPWS MDENIMHSY EAGILENPKN QAPPGIYTKI QDPAKADNTP DVLEIEFKKG VEVKVTNVKD
GTHSTSLIDL FMYLINEVAKG HGVGRIDIVE NRFIGMKSRG IYETPAGTILL YHAHLIDIEAF TMDREVRKIK QGLGLKEAEL
VYTGFWHSPE CEFVRHCIDK SQERVEGKVQ VSVFKGQVYI LGRESPLSLY NEELVSMNVQ GDYEPIIDATG FININSLRLK
EYHRLQSKVT AK
```

Mass (mono): 46466.9 Identifier: gi|25453414 Database: C:/database/rat.fasta  
 Protein Coverage: 227/412 = 55.1% by amino acid count, 25899.2/46466.9 = 55.7% by mass

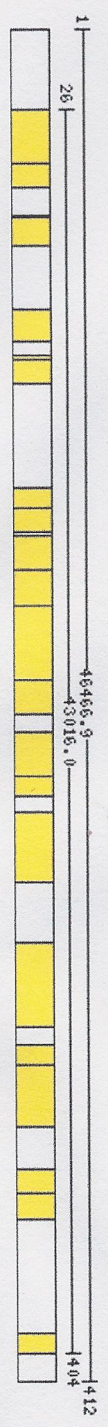

| Sort by:                 | Sequence                     | Position  |
|--------------------------|------------------------------|-----------|
| <input type="checkbox"/> | APNTPDVLEIEFK                | 216 - 228 |
| <input type="checkbox"/> | APNTPDVLEIEFK                | 216 - 229 |
| <input type="checkbox"/> | DGTTHTSTSLIDLFMYLINEVAKG     | 240 - 260 |
| <input type="checkbox"/> | EDFEEAR                      | 42 - 48   |
| <input type="checkbox"/> | EOGYDVIAIYLANIGQK            | 26 - 41   |
| <input type="checkbox"/> | FAELVYTGFWHSPECFVR           | 317 - 335 |
| <input type="checkbox"/> | GIYETTPAGTILYHAHLIDIEAFITMDR | 280 - 304 |
| <input type="checkbox"/> | GOVYILGR                     | 356 - 363 |
| <input type="checkbox"/> | GRNDIMEYAK                   | 156 - 165 |



# Flicka

Setup

CreatedTA

ViewTA

RunSequest

Status

Summary

Home

Sample: Berne, M. K7 1

Send to: [PEPQT](#) [PEPSTRT](#) [BLAST](#) [NCBI: SEQUENCE](#) [RETRACT](#)

>gi11730519|sp|P50310|PGK\_CRIGR Phosphoglycerate kinase gi12117894|pir||I48074 phosphoglycerate kinase (EC 2.7.2.3) - Chinese hamster gi1987048|emb|CAA86028.1| phosphoglycerate kinase [Cricetulus griseus] [MASS=44563]

MSLSNKLTLID KLDVKGKRRVV MRVDENVPMK **NNQITNNQR**I KAAVPSIKFC LDNGAK**SVVL** **MSHLGRPDGV** **PMPDKYSLEP**  
**VAAELIKSLIG** **KDVLFLKDCV** GPEVENACAN PAAGTVILLE NLRFHVEEFG KGDASGNKI KAEPKIDAF RASLSK**LGDV**  
**YVNDAFGTAH** **RAHSSMWGVN** **LPQKAGGFIM** KKEINYE**FAKA** **IESPERFLIA** **ILGGAKVADK** IQLINMLDK VNEMI**IGGM**  
**AFTFLKVLNN** **MEIGTSLYDE** **EGAKIVKDIM** AKAEKNGV**KI** **TLPVDFVTAD** **KFDENAKTGQ** ATVASSGIPAG WMGLDCG**TES**  
**SKRYAEAVAR** **AKQIVWNGPV** **GVFEWEAFAR** GTKSIMDEVV KATSRGCITI IGGDTATCC AK**WNTEDKVS** **HVSTGGGASL**  
**ELLEGKVLPG** **VDALSNV**

Mass (mono): 44534.0 Identifier: gi11730519 Database: C:/database/rat.fasta  
Protein Coverage: 186/417 = 44.6% by amino acid count, 20121.3/44534.0 = 45.2% by mass

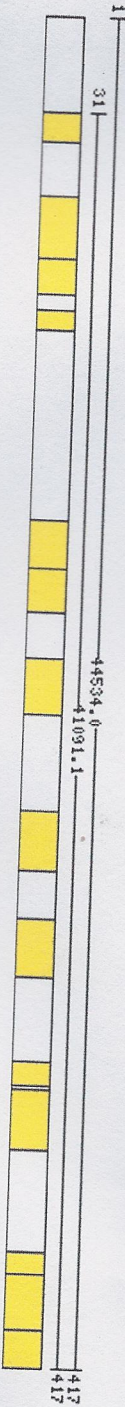

Sort by:  Sequence

Position

| Sequence                      | Position  |
|-------------------------------|-----------|
| AHSSSMVGVN <b>LPQK</b>        | 172 - 184 |
| AL <b>ESPERFLIA</b> ILGGAK    | 200 - 216 |
| DVL <b>FLK</b>                | 92 - 97   |
| ITL <b>LPVDFVTADK</b> FDENAK  | 280 - 297 |
| LG <b>DDVYYNDA</b> FGTAHR     | 157 - 171 |
| <b>NNQITNNQR</b>              | 31 - 39   |
| Q <b>IVWNGPVGVFEWEA</b> FAFAR | 333 - 350 |
| SVV <b>IMSHLGRPDGV</b> MPDK   | 57 - 75   |
| V <b>LNNMEIGTSLYDE</b> FGAK   | 247 - 264 |
| V <b>LPGVDA</b> LSNV          | 407 - 417 |



# Flicka

[Setup](#)

[Create DTA](#)

[Vu DTA](#)

[Run Sequent](#)

[Status](#)

[Summary](#)

[Home](#)

Sample: Berne, M. K7 1

Send to: [PEPSTAT](#) [PERSTAT](#) [BLFAST](#) [NCBI: SEQUENCE](#) [RESTRFACCT](#)

>gi|8392833|ref|NP\_058682.1| acetyl-coenzyme A dehydrogenase, medium chain; Acyl-Coenzyme A dehydrogenase, C-4 to C-12 straight-chain [Rattus norvegicus] gi|113018|sp|P08503|ACDM\_RAT Acyl-CoA dehydrogenase, medium-chain specific, mitochondrial precursor (MCAD) gi|66079|pir|DERTCM acyl-CoA dehydrogenase (EC 1.3.99.3) precursor, medium-chain-specific, mitochondrial - rat gi|202689|gb|AAA40670.1| acyl-CoA dehydrogenase medium subunit (EC 1.3.99.3) [MASS=46555] [MASS=46555]

MAAALRRGYK VLRSVSHFEC RAQHTKPSLK **QEPGLGFSFE** **LTEQOKEFQT** IARKFARFEI IPVAPDYDKS **GEYFPPLIKR**  
 AWELGLINTH IPESCGLGL GFEDACLITE ELAYGCTGVQ TAIKANSLGQ MPVITAGNDQ QKKKYLGRMT EQPMCAVCV  
 TEPASGSDVA GIKTKAEKKG **DEYVINGQKM** WITNGKAKNW **YFVLTRSNPD** PKVPASKAFT **GFIVEADTPG** IHIGKELNM  
 GQRCSDTRGI TFEDEVVPKE **NVLIGEGAGF** KIAMGAFDRT **RPTVAAGAVG** **LAQRALDEAT** KYALDRKTFG **KLIVEHQGVS**  
**FLIAEMAMKV** ELARLSYQRA **AMEVDSGRN** **TYFASIAKAF** AGDIANQLAT DAVQIFGGYG FNTTEYVEKLI MRDAKIYQIY  
**EGTAQIQRLI** IAREHIEKYYK N

Mass (mono): 46525.8 Identifier: gi|8392833 Database: C:/database/rat.fasta

Protein Coverage: 164/421 = 39.0% by amino acid count, 18149.4/46525.8 = 39.0% by mass

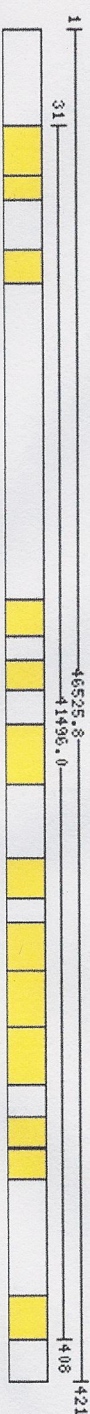

| Sort by: | Sequence           | Position  |
|----------|--------------------|-----------|
| PERSTAT  | AAAEVDSGR          | 340 - 348 |
| PERSTAT  | AFTGFIVEADTPGIHIGK | 218 - 235 |
| PERSTAT  | ALDEATK            | 295 - 301 |
| PERSTAT  | ALDEATKYALDRKTFGK  | 295 - 311 |
| PERSTAT  | ANWYFVLTTR         | 198 - 206 |
| PERSTAT  | EFQTIAR            | 47 - 53   |
| PERSTAT  | ENVLIGEGAGFK       | 260 - 271 |
| PERSTAT  | IYQIYEGTAQIQIR     | 396 - 408 |
| PERSTAT  |                    | 179 - 189 |



# Sequest Summary

Sample: Berne, M. (K11) 1 mb  
 Datafiles: [K11 \(03/02/04-03/02/04\)](#)  
 Database: [rat \(01/05/2004\)](#)  
 Directory: [mbermek11](#) [View Info](#)  
 Diff Mods: 16 M 57.02 C 0.000 X

Outfiles: [11421754](#)  
 Enzyme: [Trypsin\\_Strict](#)  
 Mass: [±1.5 \(Mono\)](#)  
 Max list: [1000](#)  
 Intensity: [1.4e10](#) [MS2](#) [DTA VCR](#)

| #                                                                                                                                                  | GBU   | TIC       | File | z    | DM     | MH+  | XC   | dCn  | Sp | RSP   | Ions | Sf    | Ref       | Q  | Sequence                     | Prob | Consensus | Depth: |  |
|----------------------------------------------------------------------------------------------------------------------------------------------------|-------|-----------|------|------|--------|------|------|------|----|-------|------|-------|-----------|----|------------------------------|------|-----------|--------|--|
| <p><b>A</b> <a href="#">gill2119726 p I156581</a> 302 611E:4.9e9 35% avg 8.0e7 {54.6,1.0,2.4}</p>                                                  |       |           |      |      |        |      |      |      |    |       |      |       |           |    |                              |      |           |        |  |
| <p>dnk-type molecular chaperone grp75 precursor - rat <a href="#">gill1000439 g I AAB34982.1 </a> grp75 [Rattus sp.] [MASS=73745] [MASS=73745]</p> |       |           |      |      |        |      |      |      |    |       |      |       |           |    |                              |      |           |        |  |
| 462                                                                                                                                                | 2.5e7 | 1838-1849 | 2    | -0.1 | 1810.1 | 5.71 | 0.56 | 2171 | 1  | 24/32 | 1    | 24/32 | g 2119726 | +1 | (-)SÖVFSTPAADGÖTÖVEIK        | V    |           | 3      |  |
| 566                                                                                                                                                | 4.0e8 | 2188-2229 | 2    | 0.3  | 1646.6 | 5.52 | ---- | 1241 | 1  | 24/30 | 1    | 24/30 | g 2119726 | +3 | (-)VINEPFAAALAYGLDK          | V    |           | 3      |  |
| 476                                                                                                                                                | 2.7e7 | 1887-1918 | 2    | 0.6  | 1809.4 | 5.44 | 0.54 | 2342 | 1  | 24/32 | 1    | 24/32 | g 2119726 | +1 | (-)SÖVFSTPAADGÖTÖVEIK        | V    |           | 3      |  |
| 491                                                                                                                                                | 1.0e7 | 1930-1958 | 2    | 0.6  | 1809.4 | 5.25 | 0.52 | 1533 | 1  | 22/32 | 1    | 22/32 | g 2119726 | +1 | (-)SÖVFSTPAADGÖTÖVEIK        | V    |           | 3      |  |
| 514                                                                                                                                                | 3.8e8 | 2013-2053 | 2    | -0.8 | 1873.7 | 4.57 | 0.51 | 1472 | 1  | 21/32 | 1    | 21/32 | g 2119726 | +1 | (-)VEAVNM*AEGIHDETEK         | V    |           | 3      |  |
| 649                                                                                                                                                | 1.9e7 | 2440-2464 | 2    | -0.3 | 2642.6 | 4.45 | 0.62 | 606  | 1  | 20/46 | 1    | 20/46 | g 2119726 | +2 | (-)C#ELSSVÖTDINLPYLTM*DASGPK | V    |           | 3      |  |
| 509                                                                                                                                                | 1.7e8 | 1992-2024 | 2    | 0.1  | 1243.3 | 4.33 | 0.35 | 1174 | 1  | 20/22 | 1    | 20/22 | g 2119726 | +2 | (-)DAGÖISGINVLR              | V    |           | 3      |  |
| 385                                                                                                                                                | 7.3e7 | 1624-1654 | 2    | 0.6  | 1474.1 | 4.20 | 0.51 | 1460 | 1  | 22/26 | 1    | 22/26 | g 2119726 | +1 | (-)EQÖIYÖSSGGLSK             | V    |           | 3      |  |
| 667                                                                                                                                                | 1.4e8 | 2510-2542 | 2    | -0.1 | 1569.9 | 4.13 | 0.48 | 1130 | 1  | 20/26 | 1    | 20/26 | g 2119726 | +2 | (-)IYSPSÖIGAFVIM*K           | V    |           | 3      |  |
| 362                                                                                                                                                | 2.4e7 | 1570-1582 | 2    | -0.6 | 1870.4 | 4.05 | 0.53 | 1147 | 1  | 21/28 | 1    | 21/28 | g 2119726 | +1 | (-)M*EEFKDÖLPADFC#MK         | V    |           | 3      |  |
| 672                                                                                                                                                | 3.4e8 | 2534-2571 | 2    | 0.2  | 1334.4 | 4.04 | 0.42 | 1541 | 1  | 19/22 | 1    | 19/22 | g 2119726 | +5 | (-)AQFEGIVTDLIK              | V    |           | 3      |  |
| 739                                                                                                                                                | 6.1e5 | 2773-2776 | 2    | 0.9  | 2309.7 | 4.02 | 0.56 | 957  | 1  | 21/42 | 1    | 21/42 | g 2119726 | +1 | (-)GVPEIETFDIDANGIVHSAK      | V    |           | 3      |  |
| 500                                                                                                                                                | 2.9e8 | 1956-1994 | 2    | 0.6  | 1290.9 | 3.99 | 0.45 | 1426 | 1  | 17/20 | 1    | 17/20 | g 2119726 | +1 | (-)VÖQFVÖDILFGR              | V    |           | 3      |  |
| 533                                                                                                                                                | 3.4e8 | 2077-2112 | 2    | -0.4 | 1463.2 | 3.89 | 0.32 | 786  | 1  | 18/26 | 1    | 18/26 | g 2119726 | +2 | (-)SDIGEVILVGM*TR            | V    |           | 3      |  |
| 322                                                                                                                                                | 8.4e6 | 1383-1389 | 2    | 0.0  | 1334.4 | 3.88 | 0.47 | 975  | 1  | 16/22 | 1    | 16/22 | g 2119726 | +3 | (-)ETAENYLGHTAK              | V    |           | 3      |  |
| 517                                                                                                                                                | 1.2e8 | 2025-2055 | 3    | -1.0 | 1874.0 | 3.83 | 0.43 | 688  | 1  | 29/64 | 1    | 29/64 | g 2119726 | +1 | (-)VEAVNM*AEGIHDETEK         | V    |           | 3      |  |
| 713                                                                                                                                                | 7.1e7 | 2637-2656 | 2    | 0.5  | 1593.5 | 3.81 | 0.55 | 766  | 1  | 21/28 | 1    | 21/28 | g 2119726 | +1 | (-)LLGÖFTLLIGIPPPAPR         | V    |           | 3      |  |
| 310                                                                                                                                                | 2.6e7 | 1310-1330 | 2    | -0.8 | 1609.6 | 3.81 | 0.49 | 1291 | 1  | 20/26 | 1    | 20/26 | g 2119726 | +3 | (-)M*KETAEMLYLGHTAK          | V    |           | 3      |  |
| 358                                                                                                                                                | 3.6e7 | 1528-1533 | 2    | 0.3  | 1569.4 | 3.80 | 0.45 | 644  | 1  | 17/26 | 1    | 17/26 | g 2119726 | +2 | (-)QAVTNPNTFYAFK             | V    |           | 3      |  |
| 528                                                                                                                                                | 1.2e7 | 2062-2073 | 2    | -0.7 | 1244.2 | 3.70 | 0.26 | 1384 | 1  | 20/22 | 1    | 20/22 | g 2119726 | +2 | (-)DAGÖISGINVLR              | V    |           | 3      |  |
| 316                                                                                                                                                | 3.8e7 | 1353-1370 | 2    | 0.0  | 1232.4 | 3.69 | 0.43 | 806  | 1  | 17/22 | 1    | 17/22 | g 2119726 | +2 | (-)QAASSLQÖASLK              | V    |           | 3      |  |
| 303                                                                                                                                                | 1.0e7 | 1292-1298 | 2    | 0.1  | 1342.3 | 3.65 | 0.42 | 1129 | 1  | 18/24 | 1    | 18/24 | g 2119726 | +2 | (-)ASNGDAWEAHHK              | V    |           | 3      |  |
| 466                                                                                                                                                | 4.0e8 | 1846-1885 | 2    | 0.5  | 1477.1 | 3.55 | 0.61 | 695  | 1  | 17/26 | 1    | 17/26 | g 2119726 | +2 | (-)TTPSVVAFPTPDGER           | V    |           | 3      |  |
| 728                                                                                                                                                | 3.3e7 | 2742-2775 | 2    | 0.1  | 1593.4 | 3.46 | 0.36 | 734  | 1  | 20/28 | 1    | 20/28 | g 2119726 | +1 | (-)LLGÖFTLLIGIPPPAPR         | V    |           | 3      |  |
| 718                                                                                                                                                | 1.8e8 | 2692-2737 | 2    | 0.6  | 1593.9 | 3.49 | 0.45 | 577  | 1  | 19/28 | 1    | 19/28 | g 2119726 | +1 | (-)LLGÖFTLLIGIPPPAPR         | V    |           | 3      |  |
| 204                                                                                                                                                | 1.6e8 | 0954-0993 | 2    | -0.2 | 959.2  | 3.28 | 0.34 | 661  | 1  | 14/16 | 1    | 14/16 | g 2119726 | +2 | (-)VLENAEHAR                 | V    |           | 3      |  |
| 557                                                                                                                                                | 4.3e8 | 2155-2192 | 2    | 0.3  | 1695.6 | 3.23 | 0.09 | 577  | 1  | 20/28 | 1    | 20/28 | g 2119726 | +2 | (-)NAVITVPAYFNDSÖR           | V    |           | 3      |  |
| 695                                                                                                                                                | 4.9e6 | 2606-2612 | 2    | -0.6 | 1335.1 | 3.17 | 0.34 | 1325 | 1  | 17/22 | 1    | 17/22 | g 2119726 | +5 | (-)AQFEGIVTDLIK              | V    |           | 3      |  |
| 469                                                                                                                                                | 1.1e7 | 1862-1876 | 1    | 0.6  | 1477.0 | 3.08 | 0.39 | 337  | 1  | 16/26 | 1    | 16/26 | g 2119726 | +2 | (-)TTPSVVAFPTPDGER           | V    |           | 3      |  |
| 432                                                                                                                                                | 1.4e6 | 1744      | 2    | 0.4  | 1474.2 | 3.08 | 0.39 | 661  | 1  | 16/26 | 1    | 16/26 | g 2119726 | +1 | (-)EQÖIYÖSSGGLSK             | V    |           | 3      |  |
| 524                                                                                                                                                | 8.8e6 | 2060-2068 | 2    | -1.5 | 1293.6 | 3.02 | 0.30 | 1422 | 1  | 15/26 | 1    | 15/26 | g 2119726 | +1 | (-)VÖQFVÖDILFGR              | V    |           | 3      |  |
| 391                                                                                                                                                | 1.5e6 | 1636      | 1    | 1.0  | 1473.6 | 2.98 | 0.47 | 434  | 1  | 13/16 | 1    | 13/16 | g 2119726 | +1 | (-)EQÖIYÖSSGGLSK             | V    |           | 3      |  |
| 214                                                                                                                                                | 1.6e8 | 0990-1022 | 2    | 0.0  | 1150.2 | 2.92 | 0.23 | 502  | 1  | 13/16 | 1    | 13/16 | g 2119726 | +2 | (-)RYDDPEVÖK                 | V    |           | 3      |  |
| 569                                                                                                                                                | 6.2e6 | 2206-2217 | 2    | 0.1  | 1695.8 | 2.85 | ---- | 387  | 1  | 14/28 | 1    | 14/28 | g 2119726 | +2 | (-)NAVITVPAYFNDSÖR           | V    |           | 3      |  |



# Flicka

[Setup](#)   
 [Create DTA](#)   
 [View DTA](#)   
 [Run Sequest](#)   
 [Status](#)   
 [Summary](#)   
 [Home](#)

Sample: Berne, M. K11 1

Send to: [PEPSTRT](#) [PEPSTRT](#) [BLAST](#)   
 NCBI: [SEQUENCE](#) [RESTRIC](#)

>gi|2119726|pir|I156581 dnaK-type molecular chaperone grp75 precursor - rat gi|1000439|gb|AAB34982.1| grp75

[Rattus sp.] [MASS=73745] [MASS=737451]  
 MISASRAAA RLYGTTASRS PAARHQDGM NGLSHEAFRF VSRRDYASEA IKGAVVGIDL GTTNSCVAVM EGKQAKYLEN  
 AEGARTPSV VAFPTDGERL VGMPAKQAV TNPNTFYAT KRLIGRRYDD PEVQKDTKNV PFKIVRASNG DAWVEAHGKL  
 YSPSQIGAFV IMKKEETAEN YLGHTAKNAV ITVPAYFNDS QROATKDAQO ISGLNVLRLI NEPTAALAY GIDKSEDKVI  
 AVYDLGGTF DISILEIQK VFEVKSTNGD TFLGGEFDDQ ALLRHIVKEF KRETGVDLTK DNMALQVRE AAERKAKCELS  
 SSVQTDINLP YLTMDASGPK HLNMKLTAAQ FEGIVTDLIK RTIAPCCOKAM QDAEVSXSDI GEVILVGGMT RMPKVOQITVQ  
 DLFRAPSKA VNPDEAVAIG AAIQGGVLAG DVTVDVLLLDV TPLSLGIETL GGVFTKLINK NTTIIPTKKSQ VFSTAADGQT  
 QVEIKVCCGE REMAGDNKLL GQFTLIGIPP APRGVPOIEV TFDIDANGIV HVSAKDKGTG REQIVIVQSS GGLSKDDIEN  
 MVKNAEKYAE EDRRKKERVE AVNMAEGTIH DTETKMEEFK DQLPADECNK IKELISKMRE LLARKDSEITG ENIRQAASSL  
 QQASIKLLEM AYKMASERE GSSSSSTGEQ KEDQKEEKQ

Mass (mono): 73698.8    Identifier: gi|2119726    Database: C:/database/rat.fasta  
 Protein Coverage: 361/679 = 53.2% by amino acid count, 39119.9/73698.8 = 53.1% by mass

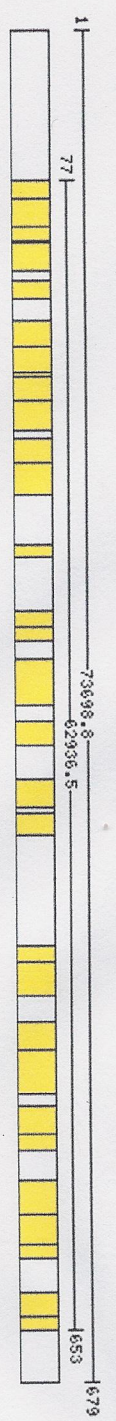

Sort by:  Sequence  Position

| PEPSTRT | Sequence                  | Position  |
|---------|---------------------------|-----------|
| PEPSTRT | AQFEIGIVTDLIK             | 349 - 360 |
| PEPSTRT | ASNGDAWVEAHGK             | 147 - 159 |
| PEPSTRT | CELISSSVQTDINLPYLTMDASGPK | 317 - 340 |
| PEPSTRT | DAGQISGINVLIR             | 207 - 218 |
| PEPSTRT | DDIENMVK                  | 556 - 563 |
| PEPSTRT | DNMALQVRE                 | 301 - 307 |
| PEPSTRT | EQQIVIVQSSGGLSK           | 542 - 555 |
| PEPSTRT | ETAENYLLGHTAK             | 176 - 187 |
| PEPSTRT |                           | 293 - 300 |



# Sequest Summary

Sample: Berne, M. (K301) 1 mb

DataFiles: K301 (04/05/04-04/05/04)

Database: rat (01/05/2004)

Directory: mbernek301 View Info

Diff Mods: 16 M 57.02 C 0.000 X

OutFiles: 13191895

Enzyme: Trypsin\_Strict

Mass: ±1.5 (Mono)

Max list: 1000

Intensity: 9.4e9

MS2

DTA VCR

File Select Sequest Protein Utilities Help

| # | GBU | TIC | File | z | DM | MH+ | XC | dCn | Sp | RSP | Ions | SF | Ref | Sequence | Prob | Consensus | Depth: |
|---|-----|-----|------|---|----|-----|----|-----|----|-----|------|----|-----|----------|------|-----------|--------|
|---|-----|-----|------|---|----|-----|----|-----|----|-----|------|----|-----|----------|------|-----------|--------|

| A g 16729936 pdb 1MAB G +1.76 1612.7 1e8 8% avg:4.5e7 {3.0,0.0,0} |                      |                         |                                                                          |      |        |      |      |      |    |       |    |  |             |                                        |  |  |  |
|-------------------------------------------------------------------|----------------------|-------------------------|--------------------------------------------------------------------------|------|--------|------|------|------|----|-------|----|--|-------------|----------------------------------------|--|--|--|
| Chain G                                                           | Rat Liver F1-Atypase | g 1310190 gb AAA41776.1 | ATP synthase gamma-subunit [Rattus norvegicus] [MASS=29933] [MASS=29933] |      |        |      |      |      |    |       |    |  |             |                                        |  |  |  |
| 1025                                                              | 1.4e8                | 3383-3402               | 2                                                                        | -2.2 | 3651.3 | 4.82 | 0.55 | 1181 | 1  | 22/64 | -- |  | g 167229936 | (-) KPPTEGDASVIALPELLNSGYEFDEGSIIENQFK |  |  |  |
| 1021                                                              | 3.3e8                | 3368-3416               | 2                                                                        | 1.2  | 3647.9 | 4.50 | 0.57 | 1066 | 1  | 23/64 | -- |  | g 167229936 | (-) KPPTEGDASVIALPELLNSGYEFDEGSIIENQFK |  |  |  |
| 683                                                               | 5.2e6                | 2149-2168               | 2                                                                        | -0.5 | 1755.4 | 3.27 | 0.48 | 677  | 1  | 17/28 | -- |  | g 167229936 | (-) NASDM+IDKLTITENR                   |  |  |  |
| 557                                                               | 4.5e7                | 1972-2008               | 2                                                                        | 0.0  | 1309.4 | 3.16 | 0.53 | 741  | 1  | 16/20 | -- |  | g 167229936 | (-) THSDQFLVSEFK                       |  |  |  |
| 291                                                               | 8.3e7                | 1123-1170               | 2                                                                        | 0.2  | 1078.4 | 3.11 | 0.39 | 1262 | 1  | 17/20 | -- |  | g 167229936 | (-) NDM*AAITTAAGK                      |  |  |  |
| 563                                                               | 4.5e6                | 1980-2002               | 3                                                                        | -0.7 | 1310.2 | 3.09 | 0.27 | 568  | 2  | 21/40 | -- |  | g 167229936 | (-) THSDQFLVSEFK                       |  |  |  |
| 1050                                                              | 3.1e6                | 3480-3495               | 2                                                                        | -0.4 | 3649.5 | 3.02 | 0.58 | 473  | 1  | 17/64 | -- |  | g 167229936 | (-) KPPTEGDASVIALPELLNSGYEFDEGSIIENQFK |  |  |  |
| 1034                                                              | 1.0e7                | 3431-3465               | 2                                                                        | -2.3 | 3651.4 | 3.00 | 0.41 | 276  | 1  | 13/64 | -- |  | g 167229936 | (-) KPPTEGDASVIALPELLNSGYEFDEGSIIENQFK |  |  |  |
| 568                                                               | 1.4e6                | 1988-1993               | 1                                                                        | 1.1  | 1308.4 | 2.26 | 0.43 | 627  | 1  | 13/20 | -- |  | g 167229936 | (-) THSDQFLVSEFK                       |  |  |  |
| 802                                                               | 9.1e6                | 2480-2531               | 1                                                                        | 0.6  | 1314.9 | 2.25 | 0.25 | 245  | 10 | 9/24  | -- |  | g 167229936 | (-) ELTEIISGAALD                       |  |  |  |
| 462                                                               | 4.5e7                | 1752-1781               | 2                                                                        | -0.7 | 1091.3 | 2.05 | 0.29 | 454  | 1  | 13/18 | -- |  | g 167229936 | (-) EVM*IVGIGEK                        |  |  |  |
| 502                                                               | 1.5e7                | 1847-1867               | 2                                                                        | 0.1  | 865.0  | 1.83 | ---- | 303  | 3  | 9/12  | -- |  | g 167229936 | (-) ILETFENR                           |  |  |  |
| 467                                                               | 4.5e6                | 1759-1777               | 1                                                                        | 0.1  | 1090.5 | 1.84 | 0.27 | 142  | 1  | 12/18 | -- |  | g 167229936 | (-) EVM*IVGIGEK                        |  |  |  |
| 803                                                               | 2.6e6                | 2484-2513               | 1                                                                        | -1.0 | 1316.5 | 1.56 | 0.17 | 293  | 2  | 10/24 | -- |  | g 167229936 | (-) ELTEIISGAALD                       |  |  |  |
| 804                                                               | 5.2e5                | 2489-2507               | 2                                                                        | 0.7  | 1314.8 | 1.46 | ---- | 261  | 12 | 11/24 | -- |  | g 167229936 | (-) ELTEIISGAALD                       |  |  |  |
| 306                                                               | 1.1e7                | 1225-1249               | 1                                                                        | 0.5  | 696.3  | 0.94 | ---- | 207  | 1  | 6/10  | -- |  | g 167229936 | (-) SVTSYK                             |  |  |  |

| B g 127700611 ref XP_230019.1  36 415:1.2e6 0% avg:3.1e5 {3.0,1.0,1.6} |                     |                |                |      |        |      |      |     |    |       |    |  |             |                                    |  |  |  |
|------------------------------------------------------------------------|---------------------|----------------|----------------|------|--------|------|------|-----|----|-------|----|--|-------------|------------------------------------|--|--|--|
| ftin                                                                   | [Rattus norvegicus] | [MASS=1297407] | [MASS=1297407] |      |        |      |      |     |    |       |    |  |             |                                    |  |  |  |
| 30                                                                     | 3.5e5               | 0253-0282      | 3              | -0.4 | 1415.9 | 1.37 | 0.15 | 154 | 50 | 10/44 | -- |  | g 127700611 | (-) VDM+NDAENFTC#R                 |  |  |  |
| 181                                                                    | 4.5e5               | 0460           | 2              | -1.5 | 875.5  | 1.09 | 0.03 | 153 | 50 | 6/14  | -- |  | g 127700611 | (-) NTINKAGR                       |  |  |  |
| 47                                                                     | 2.5e5               | 0283           | 2              | -0.9 | 934.4  | 1.06 | 0.01 | 107 | 27 | 5/14  | -- |  | g 127700611 | (-) IGSIC#LR                       |  |  |  |
| 1133                                                                   | 1.8e5               | 3730           | 2              | 1.1  | 3250.7 | 0.92 | ---- | 96  | 27 | 9/56  | -- |  | g 127700611 | (-) YVCOIKNDAGMRCESALLITVLEPARIVEK |  |  |  |

| C g 127666086 ref XP_222242.1  30 315:1.9e2 0% avg:6.3e6 {3.0,0.0,0.0} |                   |                |                     |               |               |      |      |     |     |       |    |  |             |                                 |  |  |  |
|------------------------------------------------------------------------|-------------------|----------------|---------------------|---------------|---------------|------|------|-----|-----|-------|----|--|-------------|---------------------------------|--|--|--|
| similar to                                                             | mKIAA0219 protein | [Mus musculus] | [Rattus norvegicus] | [MASS=313138] | [MASS=313138] |      |      |     |     |       |    |  |             |                                 |  |  |  |
| 951                                                                    | 9.6e6             | 3128-3138      | 2                   | 0.9           | 2782.3        | 1.72 | 0.03 | 51  | 376 | 7/50  | -- |  | g 127666086 | (-) TVVNSHKVLPLEFIVTDAGEVMEFGK  |  |  |  |
| 567                                                                    | 1.9e6             | 1987-2006      | 3                   | -1.2          | 2020.2        | 1.72 | 0.08 | 133 | 265 | 14/60 | -- |  | g 127666086 | (-) EM+IQQMDKKAQTRR             |  |  |  |
| 1210                                                                   | 1.4e5             | 3935           | 2                   | -1.1          | 2811.6        | 0.93 | 0.08 | 99  | 12  | 8/48  | -- |  | g 127666086 | (-) RLQELDGELEFAALGLLDATM*FRNPR |  |  |  |

D g|17380501|sp|P16086|SPCN\_RAT +1.42 515:3.8e2|0%|avg:7.5e6 {2.2,1.0,1.0}

Spectrin alpha chain, brain (Spectrin, non-erythroid alpha chain) (Alpha-II spectrin) (Fodrin alpha chain) g|13462887|gb|AAC33127.1| alpha-fodrin [Rattus norvegicus] [MASS=284637] [MASS=284637]

543 1.8e7 1949-1970 2 1.3 1524.3 2.26 ---- 407 12 11/22 -- g|17380501 +4 (-) DMDEESWIKEK

http://localhost/cgi-bin/runsummary.pl?directory=mbenek301&PULL\_TO\_TOP.x=1&max\_rank=3&max\_list=1000&sort=cons... 4/5/2004



# Flicka

[Setup](#)   
 [Create DTA](#)   
 [VADTA](#)   
 [RunSequest](#)   
 [Status](#)   
 [Summary](#)   
 [Home](#)

Sample: Berne, M. K301 1

Send to: [PEPcut](#)   
 [PEPSTAT](#)   
 [BLAST](#)   
 [NCBI: SEQUENCE](#)   
 [ABSTRACT](#)

>gi|6729936|pdb|1MAB|G Chain G, Rat Liver Fl-Atpase gi|310190|gb|AAA41776.1| ATP synthase gamma-subunit [Rattus norvegicus] [MASS=29933] [MASS=29933]  
 RDITRLKSI KNIQKITKSM KMVAAAKYAR AERELKPARV YGTGSLALYE KAEIKGPEDK KKHLLIIGVSS DRGLCGAIHS  
 SVAKQKNDM **AALTAAGKEV** **MIVGIGEKIK** SILYR**THSDQ** **FLVSEKDVGR** **KPPTFGDASV** **IALELLNSGY** **EFDEGSIIFN**  
**QFKSVISYKT** EEKPIFSFST VVAENMSIY DDIDADVLQN YQEYNLANII YYSIKESTTS EQSARMTAMD NASKNASDMI  
**DKLTLTFNRT** RQAVIT**KELI** **EISGAALD**

Mass (mono): 29914.6   
 Identifier: gi|6729936   
 Database: C:/database/rat.fasta  
 Protein Coverage: 99/270 = 36.7% by amino acid count, 10727.5/29914.6 = 35.9% by mass

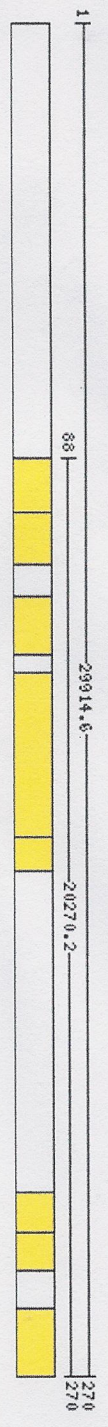

Sort by:  Sequence  Position

| Sequence                          | Position  |
|-----------------------------------|-----------|
| ELIEIISGAAALD                     | 258 - 270 |
| EVMIVGIGEK                        | 99 - 108  |
| KPPTFGDASVIALELLNSGYEFDEGSIIFNQFK | 131 - 163 |
| LTLTFNR                           | 243 - 249 |
| NASDMIDKLTLLTFNR                  | 235 - 249 |
| NDMAALLTAAGK                      | 88 - 98   |
| SVISYK                            | 164 - 169 |
| THSDQFLVSEK                       | 116 - 126 |
